# Supplementary material for: Cross-Platform Evaluation of Commercially Targeted and Untargeted Metabolomics Approaches to Optimize the Investigation of Psychiatric Disease
Source: MDPI journal article supplement (doi:10.3390/metabo11090609), 2021-09-08
Supplement: s1 [file s1]

## Supplementary Materials

### Supplementary Figures:

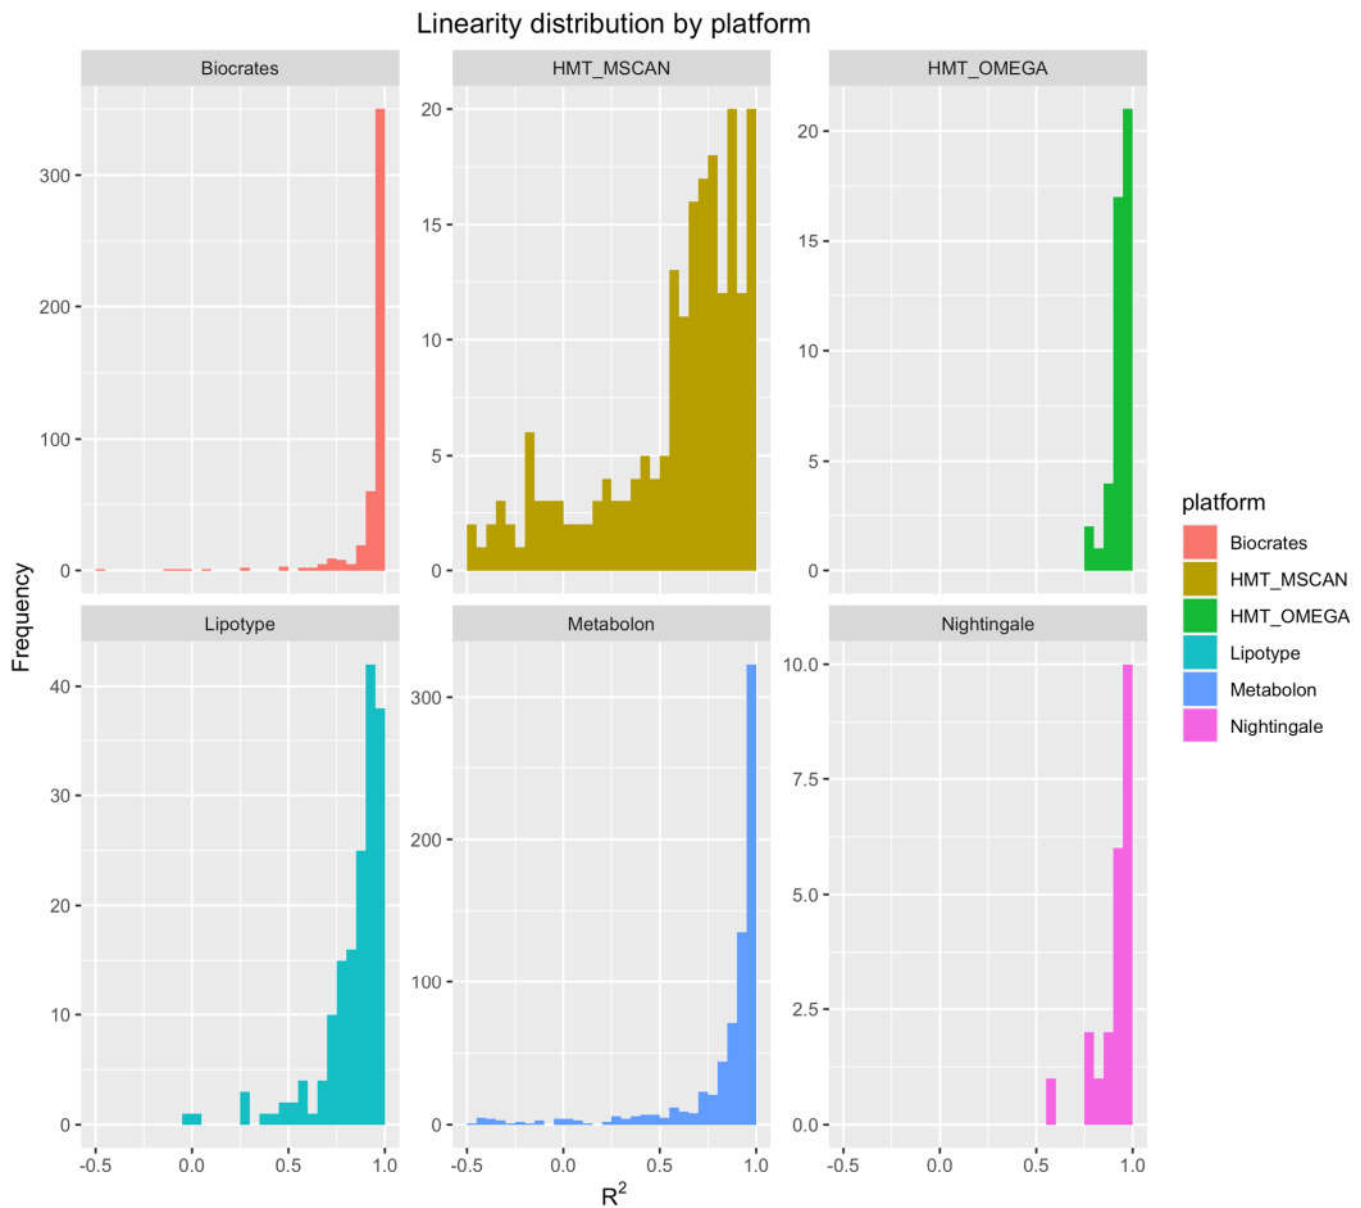

**Supplementary Figure 1: Linearity across the dilution curve of NIST pooled reference plasma (SRM 1950).** Values depicted are the coefficient of determination ( $R^2$ ) for each metabolite reported by each vendor using all points in the dilution curve.  $R^2 = 1$  for a dilution curve that is perfectly linear and extrapolates through the origin.  $R^2 = 0$  indicates no relationship between dilution and reported concentration. The majority of metabolites were detected with excellent linearity, as illustrated by the density of  $R^2$  values near 1.

*\*Note: Unknown metabolites were omitted, and a metabolite was excluded if it had missing values in the diluted samples for that platform.*

# Supplementary Tables:

**S Table 1:** List of samples sent to each metabolomics vendor in two identical shipments

| Sample number<br>(inclusive of<br>both shipments) | Sample clinical group and ID<br>(PTSD, HC, NIST) | Other information<br>(Sex and dilution) | Technical<br>replicate ID | Shipment #<br>containing<br>sample |
|---------------------------------------------------|--------------------------------------------------|-----------------------------------------|---------------------------|------------------------------------|
| 1                                                 | PTSD Sample 1                                    | Female                                  | A                         | 1                                  |
| 2                                                 |                                                  |                                         | B                         | 1                                  |
| 3                                                 |                                                  |                                         | C                         | 2                                  |
| 4                                                 |                                                  |                                         | D                         | 2                                  |
| 5                                                 | PTSD Sample 2                                    | Female                                  | A                         | 1                                  |
| 6                                                 |                                                  |                                         | B                         | 1                                  |
| 7                                                 |                                                  |                                         | C                         | 2                                  |
| 8                                                 |                                                  |                                         | D                         | 2                                  |
| 9                                                 | PTSD Sample 3                                    | Female                                  | A                         | 1                                  |
| 10                                                |                                                  |                                         | B                         | 2                                  |
| 11                                                | PTSD Sample 4                                    | Male                                    | A                         | 1                                  |
| 12                                                |                                                  |                                         | B                         | 1                                  |
| 13                                                |                                                  |                                         | C                         | 2                                  |
| 14                                                |                                                  |                                         | D                         | 2                                  |
| 15                                                | PTSD Sample 5                                    | Male                                    | A                         | 1                                  |
| 16                                                |                                                  |                                         | B                         | 2                                  |
| 17                                                | PTSD Sample 6                                    | Male                                    | A                         | 1                                  |
| 18                                                |                                                  |                                         | B                         | 2                                  |
| 19                                                | Healthy Control Sample 7                         | Female                                  | A                         | 1                                  |
| 20                                                |                                                  |                                         | B                         | 1                                  |
| 21                                                |                                                  |                                         | C                         | 2                                  |
| 22                                                |                                                  |                                         | D                         | 2                                  |
| 23                                                | Healthy Control Sample 8                         | Female                                  | A                         | 1                                  |
| 24                                                |                                                  |                                         | B                         | 1                                  |
| 25                                                |                                                  |                                         | C                         | 2                                  |
| 26                                                |                                                  |                                         | D                         | 2                                  |
| 27                                                | Healthy Control Sample 9                         | Female                                  | A                         | 1                                  |
| 28                                                |                                                  |                                         | B                         | 2                                  |
| 29                                                | Healthy Control Sample 10                        | Male                                    | A                         | 1                                  |
| 30                                                |                                                  |                                         | B                         | 1                                  |
| 31                                                |                                                  |                                         | C                         | 2                                  |
| 32                                                |                                                  |                                         | D                         | 2                                  |
| 33                                                | Healthy Control Sample 11                        | Male                                    | A                         | 1                                  |
| 34                                                |                                                  |                                         | B                         | 2                                  |
| 35                                                | Healthy Control Sample 12                        | Male                                    | A                         | 1                                  |
| 36                                                |                                                  |                                         | B                         | 2                                  |
| 37                                                | NIST Plasma Pool                                 | 100% (undiluted)                        | A                         | 1                                  |
| 38                                                |                                                  |                                         | B                         | 1                                  |
| 39                                                |                                                  |                                         | C                         | 2                                  |
| 40                                                |                                                  |                                         | D                         | 2                                  |
| 41                                                | NIST Plasma Pool                                 | 80% (saline diluted)                    | A                         | 1                                  |
| 42                                                |                                                  |                                         | B                         | 2                                  |
| 43                                                | NIST Plasma Pool                                 | 60% (saline diluted)                    | A                         | 1                                  |
| 44                                                |                                                  |                                         | B                         | 2                                  |
| 45                                                | NIST Plasma Pool                                 | 40% (saline diluted)                    | A                         | 1                                  |
| 46                                                |                                                  |                                         | B                         | 2                                  |

**Supplementary Table 2: Metabolomics Bake-off Sample Information**

| Sample ID                 | Sex    | Age | Month/year of storage* |
|---------------------------|--------|-----|------------------------|
| PTSD Sample 1             | Female | 25  | 10/18                  |
| PTSD Sample 2             | Female | 26  | 10/18                  |
| PTSD Sample 3             | Female | 27  | 10/18                  |
| PTSD Sample 4             | Male   | 39  | 4/18                   |
| PTSD Sample 5             | Male   | 27  | 7/18                   |
| PTSD Sample 6             | Male   | 34  | 10/18                  |
| Healthy Control Sample 7  | Female | 35  | 12/19                  |
| Healthy Control Sample 8  | Female | 30  | 12/19                  |
| Healthy Control Sample 9  | Female | 29  | 11/19                  |
| Healthy Control Sample 10 | Male   | 25  | 11/19                  |
| Healthy Control Sample 11 | Male   | 31  | 11/19                  |
| Healthy Control Sample 12 | Male   | 29  | 11/19                  |

\*Clinical and control samples could not be matched on storage duration as it was necessary to prioritize either collection method or storage duration, and collection method (Vacutainer) was deemed a higher priority.

**Supplementary Table 3:** Metabolites and lipids implicated in posttraumatic stress disorder (PTSD) in previously published metabolomics studies

| Metabolites                                                          | Direction in PTSD* | Citation <sup>†</sup>                |
|----------------------------------------------------------------------|--------------------|--------------------------------------|
| <b>Hormones</b>                                                      |                    |                                      |
| (1) Cortisol                                                         | Increase           | (Mellon et al., 2019)                |
| (2) Epinephrine                                                      | Increase           | (Somvanshi et al., 2019)             |
| <b>Nucleotides</b>                                                   |                    |                                      |
| (3) Hypoxanthine                                                     | Increase           | (Somvanshi et al., 2019)             |
|                                                                      | Increase           | (Mellon et al., 2019)                |
| <b>Nucleosides</b>                                                   |                    |                                      |
| (4) Guanosine                                                        | Decrease           | (Karabatsiakis et al., 2015)         |
| (5) Inosine                                                          | Decrease           | (Karabatsiakis et al., 2015)         |
| <b>Bile acids and derivatives</b>                                    |                    |                                      |
| (6) 3 $\alpha$ -hydroxy-5 $\beta$ -cholan-24-oic acid                | Decrease           | (Karabatsiakis et al., 2015)         |
| (7) 7 $\alpha$ ,12 $\alpha$ -dihydroxy-3-oxocholest-4-en-26-oic acid | Increase           | (Karabatsiakis et al., 2015)         |
| (8) Glycocholic Acid                                                 | Decrease           | (Karabatsiakis et al., 2015)         |
| <b>Glycolysis</b>                                                    |                    |                                      |
| (9) Glucose                                                          | Increase           | (Somvanshi et al., 2019)             |
| (10) Lactate                                                         | Increase           | (Somvanshi et al., 2019)             |
|                                                                      | Increase           | (Dean et al., 2019)                  |
|                                                                      | Increase           | (Mellon et al., 2019)                |
| (11) Pyruvate                                                        | Increase           | (Somvanshi et al., 2019)             |
|                                                                      | Increase           | (Mellon et al., 2019)                |
| (12) Citrate                                                         | Decrease           | (Somvanshi et al., 2019)             |
|                                                                      | Increase           | (Dean et al., 2019)                  |
|                                                                      | Decrease           | (Mellon et al., 2019)                |
| <b>Amino acids</b>                                                   |                    |                                      |
| (13) Alanine                                                         | Increase           | (Somvanshi et al., 2019)             |
| (14) Glutamine                                                       | Decrease           | (Somvanshi et al., 2019)             |
|                                                                      | Decrease           | (Mellon et al., 2019)                |
| (15) Tyrosine                                                        | Increase           | (Somvanshi et al., 2019)             |
| (16) Isoleucine                                                      | Increase           | (Somvanshi et al., 2019)             |
| (17) Trans-urocanate                                                 | Decrease           | (Mellon et al., 2019)                |
| (18) Phenyllactate (PLA)                                             | Increase           | (Mellon et al., 2019)                |
| (19) 3-hydroxyisobutyrate                                            | Decrease           | (Mellon et al., 2019)                |
| (20) Proline                                                         | Increase           | (Konjevod et al., 2020) <sup>#</sup> |
| (21) 4-hydroxyproline                                                | Increase           | (Konjevod et al., 2020) <sup>#</sup> |
| (22) Aminomalonic acid                                               | Increase           | (Konjevod et al., 2020) <sup>#</sup> |
| <b>Organooxygen compounds</b>                                        |                    |                                      |
| (23) Kynurenine                                                      | Decrease           | (Smith et al., 2020)                 |
| <b>Hydroxy acids</b>                                                 |                    |                                      |

|                                                          |                        |                                      |
|----------------------------------------------------------|------------------------|--------------------------------------|
| (24) Malic acid                                          | Increase               | (Konjevod et al., 2020) <sup>#</sup> |
| <b>Urea cycle</b>                                        |                        |                                      |
| (25) Arginine                                            | Decrease               | (Somvanshi et al., 2019)             |
|                                                          | Mixed across test sets | (Dean et al., 2019)                  |
|                                                          | Decrease               | (Mellon et al., 2019)                |
| (26) Ornithine                                           | Increase               | (Somvanshi et al., 2019)             |
| <b>Carnitines</b>                                        |                        |                                      |
| (27) Carnitine                                           | Decrease               | (Dean et al., 2019)                  |
| (28) Decanoylcarnitine                                   | Increase               | (Somvanshi et al., 2019)             |
|                                                          | Increase               | (Mellon et al., 2019)                |
| (29) Octanoylcarnitine                                   | Increase               | (Somvanshi et al., 2019)             |
|                                                          | Increase               | (Mellon et al., 2019)                |
| (30) Hexanoylcarnitine                                   | Increase               | (Mellon et al., 2019)                |
| (31) Linoelaidyl carnitine                               | Decrease               | (Konjevod et al., 2020) <sup>^</sup> |
| (32) Stearoylcarnitine                                   | Decrease               | (Konjevod et al., 2020) <sup>^</sup> |
| <b>Anti-Oxidants</b>                                     |                        |                                      |
| (33) Pantothenic Acid                                    | Decrease               | (Karabatsiakakis et al., 2015)       |
| <b>Monosaccharides</b>                                   |                        |                                      |
| (34) N-Acetylglucosamine-6-phosphate                     | Decrease               | (Karabatsiakakis et al., 2015)       |
| <b>Carbohydrates</b>                                     |                        |                                      |
| (35) Fructose                                            | Increase               | (Konjevod et al., 2020) <sup>#</sup> |
| <b>Quaternary ammonium salts</b>                         |                        |                                      |
| (36) Choline                                             | Increase               | (Konjevod et al., 2020) <sup>#</sup> |
| <b>Dicarboxylic acids</b>                                |                        |                                      |
| (37) 3,7-Dimethyl-2E,6E-decadien-1,10-dioic acid         | Increase               | (Konjevod et al., 2020) <sup>#</sup> |
| <b>Lipids</b>                                            |                        |                                      |
| <b>Long chain fatty acids</b>                            |                        |                                      |
| (38) 10-Nonadecenoate 19:1 ( $\omega$ -9)                | Decrease               | (Somvanshi et al., 2019)             |
| (39) Nonadecanoate 19:0                                  | Increase               | (Mellon et al., 2019)                |
| (40) Arachidonate 20:4 ( $\omega$ -6)                    | Decrease               | (Somvanshi et al., 2019)             |
| (41) Hydroxy stearic acid                                | Increase               | (Konjevod et al., 2020) <sup>^</sup> |
| <b>Essential fatty acids</b>                             |                        |                                      |
| (42) Dihomolinoleate 20:2 ( $\omega$ -6)                 | Decrease               | (Mellon et al., 2019)                |
| (43) Dihomolinolenate 20:3 ( $\omega$ -3 or $\omega$ -6) | Decrease               | (Mellon et al., 2019)                |
| (44) Docosahexaenoate (DHA) 22:6 ( $\omega$ -3)          | Decrease               | (Mellon et al., 2019)                |
| (45) Eicosenoate 20:1                                    | Decrease               | (Mellon et al., 2019)                |
| (46) Palmitoylethanolamide                               | Decrease               | (Karabatsiakakis et al., 2015)       |
| (47) Linolenate 18:3 ( $\omega$ -3 or $\omega$ -6)       | Decrease               | (Mellon et al., 2019)                |
| (48) Palmitic amide                                      | Decrease               | (Karabatsiakakis et al., 2015)       |
| <b>Fatty acid esters</b>                                 |                        |                                      |
| (49) Arachidonic acid methyl ester                       | Increase               | (Konjevod et al., 2020) <sup>#</sup> |

| Glycerophospholipids            |          |                                       |
|---------------------------------|----------|---------------------------------------|
| (50) PE(0:0/16:0)               | Increase | (Konjevod et al., 2020) <sup>#</sup>  |
| (51) PE(17:1(9Z)18:0)           | Increase | (Karabatsiakos et al., 2015)          |
| (52) PE(P-18:1(11Z)/15:0)       | Increase | (Karabatsiakos et al., 2015)          |
| (53) PE(18:1/0:0)               | Increase | (Konjevod et al., 2020) <sup>^#</sup> |
| (54) PE-Nme(O-14:0/O-14:0)      | Increase | (Karabatsiakos et al., 2015)          |
| (55) PE-NMe2(O-14:0/O-14:0)     | Increase | (Karabatsiakos et al., 2015)          |
| Glycerophosphocholines          |          |                                       |
| (56) PC(16:0/0:0)               | Increase | (Konjevod et al., 2020) <sup>#</sup>  |
| (57) PC(16:1/0:0)               | Increase | (Konjevod et al., 2020) <sup>^</sup>  |
| (58) PC(16:2/0:0)               | Increase | (Konjevod et al., 2020) <sup>#</sup>  |
| (59) PC(17:0/0:0)               | Increase | (Konjevod et al., 2020) <sup>#</sup>  |
| (60) PC(18:0/0:0)               | Decrease | (Konjevod et al., 2020) <sup>#</sup>  |
| (61) PC(18:1/0:0)               | Increase | (Konjevod et al., 2020) <sup>^#</sup> |
| (62) PC(19:0/0:0)               | Increase | (Konjevod et al., 2020) <sup>#</sup>  |
| (63) PC(20:4/0:0)               | Increase | (Konjevod et al., 2020) <sup>#</sup>  |
| (64) PC(22:4/0:0)               | Increase | (Konjevod et al., 2020) <sup>#</sup>  |
| (65) PC(O-16:1/0:0)             | Increase | (Konjevod et al., 2020) <sup>#</sup>  |
| (66) PC(P-18:0/2:0)             | Increase | (Konjevod et al., 2020) <sup>#</sup>  |
| (67) PC(P-18:1/0:0)             | Increase | (Konjevod et al., 2020) <sup>#</sup>  |
| Glycerophosphoinositols         |          |                                       |
| (68) PI(18:1/0:0)               | Increase | (Konjevod et al., 2020) <sup>#</sup>  |
| Triglycerides                   |          |                                       |
| (69) Triglycerides              | Increase | (Somvanshi et al., 2019)              |
| (70) TG(46:1)                   |          | (Huguenard et al., 2020)              |
| (71) TG(54:6)                   |          | (Huguenard et al., 2020)              |
| Phosphatidylserines             |          |                                       |
| (72) Phosphatidylserine (36:2)  |          | (Huguenard et al., 2020)              |
| Oxidative Stress & Inflammation |          |                                       |
| (73) Gammaglutamyltyrosine      | Increase | (Dean et al., 2019)                   |
| (74) 5-Oxoproline               | Increase | (Mellon et al., 2019)                 |
| (75) Sphingosine 1 phosphate    | Increase | (Mellon et al., 2019)                 |
| (76) Sphingosine 1-phosphate    | Decrease | (Konjevod et al., 2020) <sup>^</sup>  |
| TNF-a / IL6 / CRP               | Increase | (Somvanshi et al., 2019)              |

\* Versus controls if available

+ The publications Somvanshi et al., 2019 and Dean et al., 2019 specify that they use the same data, and Mellon et al., 2019 appear to use the same data with an additional ~30 subjects compared with Somvanshi et al., 2019 and Dean et al., 2019 such that replication in these studies may not represent independent replication

<sup>^</sup> indicates found in exploratory cohort

<sup>#</sup> indicates found in validation cohort
